# Supplementary material
Source: PubMed Central journal article supplement (PMC7350988)
Supplement: ASN.2019121308SupplementaryData.pdf [file ASN.2019121308SupplementaryData.pdf]

## **SUPPLEMENTAL MATERIAL**

### **Table of Contents:**

- Table S1. Total annualized healthcare costs (95% CI) and CKD-related costs by resource for all analysis groups in total and among patients age 65 and older adjusted for age, sex and race/ethnicity. Comorbidity groups are not mutually exclusive.
- Tables S2A. Annualized healthcare care costs in total (95% confidence intervals) and by eGFR category and by resource adjusted for age, sex, and race/ethnicity among patients with CKD only.
- Tables S2B. Annualized healthcare care costs in total (95% confidence intervals) and by eGFR category and by resource adjusted for age, sex, and race/ethnicity among patients with CKD and DM.
- Tables S2C. Annualized healthcare care costs in total (95% confidence intervals) and by eGFR category and by resource adjusted for age, sex, and race/ethnicity among patients with CKD and CVD.
- Tables S2D. Annualized healthcare care costs in total (95% confidence intervals) and by eGFR category and by resource adjusted for age, sex, and race/ethnicity among patients with CKD, DM and CVD.
- Tables S2E. Annualized healthcare care costs in total (95% confidence intervals) and by eGFR category and by resource adjusted for age, sex, and race/ethnicity among patients with CKD and HF.
- Tables S2F. Annualized healthcare care costs in total (95% confidence intervals) and by eGFR category and by resource adjusted for age, sex, and race/ethnicity among patients with CKD, DM and HF.

Table S1. Total annualized healthcare costs (95% CI) and CKD-related costs by resource for all analysis groups in total and among patients age 65 and older adjusted for age, sex and race/ethnicity. Comorbidity groups are not mutually exclusive.

|              | All Age Groups |          |          |                   |         |         | Ages 65 and Older |          |          |                   |         |         |
|--------------|----------------|----------|----------|-------------------|---------|---------|-------------------|----------|----------|-------------------|---------|---------|
|              | Total Costs    |          |          | CKD-Related Costs |         |         | Total Costs       |          |          | CKD-Related Costs |         |         |
|              | Mean           | 95% CI   |          | Mean              | 95% CI  |         | Mean              | 95% CI   |          | Mean              | 95% CI  |         |
| All Patients |                |          |          |                   |         |         |                   |          |          |                   |         |         |
| Inpatient    | \$2,195        | \$2,045  | \$2,346  | \$30              | \$15    | \$45    | \$3,470           | \$3,161  | \$3,778  | \$57              | \$47    | \$66    |
| Pharmacy     | \$1,793        | \$1,694  | \$1,892  | \$43              | \$37    | \$48    | \$1,695           | \$1,580  | \$1,810  | \$56              | \$47    | \$66    |
| Outpatient   | \$1,995        | \$1,965  | \$2,025  | \$17              | \$14    | \$20    | \$2,233           | \$2,185  | \$2,282  | \$25              | \$20    | \$30    |
| Emergency    | \$463          | \$437    | \$488    | \$1               | \$0     | \$2     | \$675             | \$624    | \$726    | \$2               | \$0     | \$4     |
| Dialysis     | \$142          | \$114    | \$171    | \$142             | \$114   | \$171   | \$182             | \$135    | \$229    | \$182             | \$135   | \$229   |
| Total        | \$6,588        | \$6,385  | \$6,792  | \$233             | \$198   | \$268   | \$8,255           | \$7,880  | \$8,629  | \$322             | \$257   | \$387   |
| No CKD       |                |          |          |                   |         |         |                   |          |          |                   |         |         |
| Inpatient    | \$1,676        | \$1,582  | \$1,771  | \$8               | \$3     | \$13    | \$2,677           | \$2,482  | \$2,871  | \$18              | \$5     | \$31    |
| Pharmacy     | \$1,683        | \$1,606  | \$1,760  | \$24              | \$23    | \$26    | \$1,548           | \$1,459  | \$1,638  | \$36              | \$34    | \$37    |
| Outpatient   | \$1,889        | \$1,867  | \$1,912  | \$1               | \$0     | \$1     | \$2,119           | \$2,083  | \$2,154  | \$1               | \$0     | \$2     |
| Emergency    | \$383          | \$365    | \$400    | \$0               | --      | --      | \$527             | \$493    | \$560    | \$1               | \$0     | \$2     |
| Dialysis     | \$0            | --       | --       | \$0               | --      | --      | \$0               | --       | --       | \$2               | \$0     | \$5     |
| Total        | \$5,631        | \$5,497  | \$5,768  | \$33              | \$28    | \$40    | \$6,871           | \$6,632  | \$7,112  | \$58              | \$43    | \$72    |
| All CKD      |                |          |          |                   |         |         |                   |          |          |                   |         |         |
| Inpatient    | \$5,249        | \$4,654  | \$5,844  | \$161             | \$81    | \$241   | \$5,294           | \$4,673  | \$5,916  | \$146             | \$56    | \$236   |
| Pharmacy     | \$2,425        | \$2,195  | \$2,654  | \$148             | \$117   | \$179   | \$2,030           | \$1,866  | \$2,193  | \$103             | \$78    | \$129   |
| Outpatient   | \$2,610        | \$2,529  | \$2,691  | \$114             | \$99    | \$130   | \$2,495           | \$2,414  | \$2,577  | \$81              | \$67    | \$95    |
| Emergency    | \$941          | \$855    | \$1,027  | \$4               | \$0     | \$9     | \$1,018           | \$918    | \$1,117  | \$5               | \$0     | \$10    |
| Dialysis     | \$976          | \$810    | \$1,141  | \$976             | \$810   | \$1,141 | \$597             | \$464    | \$730    | \$597             | \$464   | \$730   |
| Total        | \$12,201       | \$11,463 | \$12,938 | \$1,403           | \$1,201 | \$1,605 | \$11,434          | \$10,694 | \$12,173 | \$932             | \$755   | \$1,108 |
| CKD Only     |                |          |          |                   |         |         |                   |          |          |                   |         |         |
| Inpatient    | \$2,583        | \$2,097  | \$3,069  | \$47              | \$4     | \$91    | \$2,708           | \$2,170  | \$3,246  | \$42              | \$0     | \$92    |
| Pharmacy     | \$1,747        | \$1,500  | \$1,995  | \$94              | \$60    | \$129   | \$1,399           | \$1,197  | \$1,600  | \$63              | \$36    | \$89    |
| Outpatient   | \$2,087        | \$2,004  | \$2,170  | \$56              | \$42    | \$71    | \$2,025           | \$1,942  | \$2,109  | \$37              | \$25    | \$49    |
| Emergency    | \$592          | \$506    | \$679    | \$2               | \$0     | \$4     | \$666             | \$560    | \$772    | \$2               | \$0     | \$5     |
| Dialysis     | \$364          | \$222    | \$506    | \$364             | \$222   | \$506   | \$166             | \$65     | \$268    | \$166             | \$65    | \$268   |
| Total        | \$7,374        | \$6,746  | \$8,003  | \$563             | \$396   | \$731   | \$6,964           | \$6,308  | \$7,621  | \$310             | \$178   | \$442   |
| CKD & DM     |                |          |          |                   |         |         |                   |          |          |                   |         |         |
| Inpatient    | \$7,658        | \$6,389  | \$8,927  | \$294             | \$88    | \$501   | \$7,361           | \$5,997  | \$8,724  | \$247             | \$19    | \$476   |
| Pharmacy     | \$3,316        | \$2,883  | \$3,749  | \$220             | \$158   | \$282   | \$2,816           | \$2,480  | \$3,152  | \$150             | \$99    | \$201   |
| Outpatient   | \$3,230        | \$3,053  | \$3,406  | \$208             | \$171   | \$246   | \$2,983           | \$2,811  | \$3,154  | \$148             | \$114   | \$183   |
| Emergency    | \$1,173        | \$1,003  | \$1,343  | \$7               | \$0     | \$16    | \$1,212           | \$1,020  | \$1,405  | \$7               | \$0     | \$17    |
| Dialysis     | \$1,956        | \$1,555  | \$2,357  | \$1,956           | \$1,555 | \$2,357 | \$1,224           | \$900    | \$1,549  | \$1,224           | \$900   | \$1,549 |
| Total        | \$17,333       | \$15,752 | \$18,914 | \$2,685           | \$2,196 | \$3,176 | \$15,596          | \$13,982 | \$17,210 | \$1,776           | \$1,349 | \$2,206 |

Table S1 (continued). Total annualized healthcare costs (95% CI) and CKD-related costs by resource for all analysis groups in total and among patients age 65 and older adjusted for age, sex and race/ethnicity. Comorbidity groups are not mutually exclusive.

|                          | All Age Groups |          |          |                   |         |         | Ages 65 and Older |          |          |                   |         |         |
|--------------------------|----------------|----------|----------|-------------------|---------|---------|-------------------|----------|----------|-------------------|---------|---------|
|                          | Total Costs    |          |          | CKD-Related Costs |         |         | Total Costs       |          |          | CKD-Related Costs |         |         |
|                          | Mean           | 95% CI   |          | Mean              | 95% CI  |         | Mean              | 95% CI   |          | Mean              | 95% CI  |         |
| <b>CKD &amp; CVD</b>     |                |          |          |                   |         |         |                   |          |          |                   |         |         |
| Inpatient                | \$10,530       | \$8,598  | \$12,462 | \$328             | \$68    | \$588   | \$10,141          | \$8,223  | \$12,060 | \$304             | \$37    | \$571   |
| Pharmacy                 | \$3,325        | \$2,619  | \$4,030  | \$214             | \$133   | \$295   | \$2,791           | \$2,441  | \$3,141  | \$154             | \$85    | \$222   |
| Outpatient               | \$3,535        | \$3,300  | \$3,769  | \$196             | \$149   | \$243   | \$3,311           | \$3,083  | \$3,539  | \$151             | \$107   | \$194   |
| Emergency                | \$1,794        | \$1,519  | \$2,069  | \$8               | \$0     | \$19    | \$1,814           | \$1,521  | \$2,106  | \$9               | \$0     | \$21    |
| Dialysis                 | \$1,857        | \$1,387  | \$2,326  | \$1,857           | \$1,387 | \$2,326 | \$1,360           | \$957    | \$1,764  | \$1,360           | \$957   | \$1,764 |
| Total                    | \$21,041       | \$18,683 | \$23,398 | \$2,603           | \$2,014 | \$3,190 | \$19,417          | \$17,170 | \$21,664 | \$1,978           | \$1,447 | \$2,507 |
| <b>CKD, DM &amp; CVD</b> |                |          |          |                   |         |         |                   |          |          |                   |         |         |
| Inpatient                | \$13,278       | \$10,028 | \$16,527 | \$483             | \$0     | \$969   | \$12,637          | \$9,191  | \$16,084 | \$438             | \$0     | \$941   |
| Pharmacy                 | \$4,333        | \$3,166  | \$5,501  | \$288             | \$165   | \$411   | \$3,642           | \$3,032  | \$4,253  | \$198             | \$106   | \$291   |
| Outpatient               | \$4,250        | \$3,843  | \$4,658  | \$321             | \$230   | \$413   | \$3,878           | \$3,484  | \$4,272  | \$254             | \$165   | \$343   |
| Emergency                | \$2,046        | \$1,592  | \$2,500  | \$13              | \$0     | \$35    | \$2,022           | \$1,534  | \$2,510  | \$13              | \$0     | \$38    |
| Dialysis                 | \$3,143        | \$2,251  | \$4,035  | \$3,143           | \$2,251 | \$4,035 | \$2,368           | \$1,590  | \$3,146  | \$2,368           | \$1,590 | \$3,146 |
| Total                    | \$27,050       | \$23,035 | \$31,066 | \$4,248           | \$3,148 | \$5,346 | \$24,547          | \$20,545 | \$28,549 | \$3,271           | \$2,273 | \$4,270 |
| <b>CKD &amp; HF</b>      |                |          |          |                   |         |         |                   |          |          |                   |         |         |
| Inpatient                | \$15,169       | \$11,938 | \$18,399 | \$587             | \$183   | \$992   | \$14,309          | \$11,258 | \$17,359 | \$558             | \$127   | \$990   |
| Pharmacy                 | \$3,859        | \$3,098  | \$4,620  | \$213             | \$113   | \$313   | \$3,452           | \$2,869  | \$4,035  | \$159             | \$84    | \$234   |
| Outpatient               | \$3,921        | \$3,615  | \$4,226  | \$261             | \$196   | \$327   | \$3,627           | \$3,326  | \$3,927  | \$196             | \$138   | \$254   |
| Emergency                | \$2,244        | \$1,828  | \$2,661  | \$14              | \$0     | \$42    | \$2,204           | \$1,777  | \$2,631  | \$15              | \$0     | \$46    |
| Dialysis                 | \$2,325        | \$1,716  | \$2,934  | \$2,325           | \$1,716 | \$2,934 | \$1,781           | \$1,234  | \$2,327  | \$1,781           | \$1,234 | \$2,327 |
| Total                    | \$27,518       | \$23,825 | \$31,211 | \$3,400           | \$2,609 | \$4,192 | \$25,373          | \$21,901 | \$28,843 | \$2,709           | \$1,965 | \$3,453 |
| <b>CKD, DM &amp; HF</b>  |                |          |          |                   |         |         |                   |          |          |                   |         |         |
| Inpatient                | \$18,600       | \$13,735 | \$23,465 | \$832             | \$140   | \$1,525 | \$17,563          | \$12,386 | \$22,741 | \$774             | \$23    | \$1,526 |
| Pharmacy                 | \$4,784        | \$3,721  | \$5,848  | \$268             | \$117   | \$419   | \$4,356           | \$3,235  | \$5,476  | \$191             | \$89    | \$293   |
| Outpatient               | \$4,734        | \$4,219  | \$5,249  | \$417             | \$298   | \$536   | \$4,313           | \$3,802  | \$4,824  | \$327             | \$215   | \$439   |
| Emergency                | \$2,585        | \$1,947  | \$3,224  | \$17              | \$0     | \$48    | \$2,516           | \$1,840  | \$3,192  | \$18              | \$0     | \$53    |
| Dialysis                 | \$3,847        | \$2,764  | \$4,929  | \$3,847           | \$2,764 | \$4,929 | \$3,028           | \$2,031  | \$4,025  | \$3,028           | \$2,031 | \$4,025 |
| Total                    | \$34,550       | \$28,886 | \$40,215 | \$5,381           | \$3,995 | \$6,766 | \$31,776          | \$25,870 | \$37,682 | \$4,338           | \$3,018 | \$5,658 |

Tables S2A. Annualized healthcare care costs in total (95% confidence intervals) and by eGFR category and by resource adjusted for age, sex, and race/ethnicity among patients with CKD only.

|            | <u>G3a (n=7,783)</u> |               |         | <u>G3b (n=1,919)</u> |               |         | <u>G4 (n=263)</u> |               |          | <u>G5 (n=305)</u> |               |          |
|------------|----------------------|---------------|---------|----------------------|---------------|---------|-------------------|---------------|----------|-------------------|---------------|----------|
|            | <u>Mean</u>          | <u>95% CI</u> |         | <u>Mean</u>          | <u>95% CI</u> |         | <u>Mean</u>       | <u>95% CI</u> |          | <u>Mean</u>       | <u>95% CI</u> |          |
| Inpatient  | \$2,126              | \$1,789       | \$2,464 | \$3,298              | \$2,599       | \$3,998 | \$4,448           | \$2,537       | \$6,358  | \$8,303           | \$6,547       | \$10,060 |
| Pharmacy   | \$1,406              | \$1,235       | \$1,578 | \$1,787              | \$1,431       | \$2,144 | \$3,052           | \$2,079       | \$4,024  | \$9,179           | \$8,285       | \$10,074 |
| Outpatient | \$1,929              | \$1,868       | \$1,989 | \$2,087              | \$1,961       | \$2,214 | \$2,518           | \$2,173       | \$2,863  | \$5,815           | \$5,498       | \$6,132  |
| Emergency  | \$551                | \$491         | \$611   | \$622                | \$497         | \$747   | \$763             | \$422         | \$1,103  | \$1,343           | \$1,030       | \$1,657  |
| Dialysis   | -\$1                 | -\$100        | \$97    | \$16                 | -\$189        | \$220   | \$284             | -\$275        | \$843    | \$12,081          | \$11,567      | \$12,595 |
| Total      | \$6,011              | \$5,574       | \$6,447 | \$7,811              | \$6,906       | \$8,715 | \$11,064          | \$8,593       | \$13,534 | \$36,722          | \$34,450      | \$38,993 |

Tables S2B. Annualized healthcare care costs in total (95% confidence intervals) and by eGFR category and by resource adjusted for age, sex, and race/ethnicity among patients with CKD and DM.

|            | <u>G3a (n=4,320)</u> |               |          | <u>G3b (n=2,152)</u> |               |          | <u>G4 (n=668)</u> |               |          | <u>G5 (=575)</u> |               |          |
|------------|----------------------|---------------|----------|----------------------|---------------|----------|-------------------|---------------|----------|------------------|---------------|----------|
|            | <u>Mean</u>          | <u>95% CI</u> |          | <u>Mean</u>          | <u>95% CI</u> |          | <u>Mean</u>       | <u>95% CI</u> |          | <u>Mean</u>      | <u>95% CI</u> |          |
| Inpatient  | \$4,712              | \$3,809       | \$5,616  | \$7,685              | \$6,393       | \$8,977  | \$16,082          | \$13,666      | \$18,499 | \$19,494         | \$16,952      | \$22,035 |
| Pharmacy   | \$2,619              | \$2,311       | \$2,927  | \$3,084              | \$2,643       | \$3,525  | \$4,033           | \$3,209       | \$4,858  | \$8,491          | \$7,624       | \$9,358  |
| Outpatient | \$2,532              | \$2,398       | \$2,666  | \$2,993              | \$2,802       | \$3,185  | \$4,061           | \$3,702       | \$4,419  | \$8,299          | \$7,922       | \$8,676  |
| Emergency  | \$928                | \$807         | \$1,049  | \$1,226              | \$1,053       | \$1,399  | \$1,739           | \$1,415       | \$2,062  | \$2,117          | \$1,777       | \$2,458  |
| Dialysis   | -\$9                 | -\$294        | \$277    | \$86                 | -\$323        | \$494    | \$1,104           | \$341         | \$1,868  | \$24,452         | \$23,649      | \$25,255 |
| Total      | \$10,783             | \$9,657       | \$11,908 | \$15,075             | \$13,464      | \$16,684 | \$27,020          | \$24,009      | \$30,030 | \$62,853         | \$59,686      | \$66,020 |

Table S2C. Annualized healthcare care costs in total (95% confidence intervals) and by eGFR category and by resource adjusted for age, sex, and race/ethnicity among patients with CKD and CVD.

|            | <b>G3a (2,594)</b> |               |          | <b>G3b (n=1,373)</b> |               |          | <b>G4 (n=420)</b> |               |          | <b>G5 (n=321)</b> |               |          |
|------------|--------------------|---------------|----------|----------------------|---------------|----------|-------------------|---------------|----------|-------------------|---------------|----------|
|            | <b>Mean</b>        | <b>95% CI</b> |          | <b>Mean</b>          | <b>95% CI</b> |          | <b>Mean</b>       | <b>95% CI</b> |          | <b>Mean</b>       | <b>95% CI</b> |          |
| Inpatient  | \$7,247            | \$5,877       | \$8,618  | \$11,117             | \$9,160       | \$13,074 | \$20,844          | \$17,119      | \$24,570 | \$21,164          | \$17,132      | \$25,195 |
| Pharmacy   | \$2,370            | \$1,869       | \$2,870  | \$3,133              | \$2,418       | \$3,848  | \$4,212           | \$2,851       | \$5,572  | \$10,720          | \$9,248       | \$12,193 |
| Outpatient | \$2,979            | \$2,801       | \$3,158  | \$3,285              | \$3,030       | \$3,540  | \$4,439           | \$3,954       | \$4,924  | \$7,920           | \$7,395       | \$8,445  |
| Emergency  | \$1,598            | \$1,403       | \$1,793  | \$1,782              | \$1,503       | \$2,061  | \$2,322           | \$1,791       | \$2,852  | \$2,745           | \$2,170       | \$3,319  |
| Dialysis   | \$5                | -\$328        | \$339    | \$71                 | -\$405        | \$547    | \$1,381           | \$476         | \$2,287  | \$25,095          | \$24,115      | \$26,075 |
| Total      | \$14,200           | \$12,528      | \$15,873 | \$19,388             | \$17,000      | \$21,777 | \$33,198          | \$28,653      | \$37,744 | \$67,644          | \$62,725      | \$72,563 |

Table S2D. Annualized healthcare care costs in total (95% confidence intervals) and by eGFR category and by resource adjusted for age, sex, and race/ethnicity among patients with CKD, DM and CVD.

|            | <b>G3a (n=1,057)</b> |               |          | <b>G3b (n=709)</b> |               |          | <b>G4 (n=280)</b> |               |          | <b>G5 (n=234)</b> |               |          |
|------------|----------------------|---------------|----------|--------------------|---------------|----------|-------------------|---------------|----------|-------------------|---------------|----------|
|            | <b>Mean</b>          | <b>95% CI</b> |          | <b>Mean</b>        | <b>95% CI</b> |          | <b>Mean</b>       | <b>95% CI</b> |          | <b>Mean</b>       | <b>95% CI</b> |          |
| Inpatient  | \$8,483              | \$6,059       | \$10,907 | \$12,940           | \$9,887       | \$15,994 | \$24,172          | \$19,072      | \$29,273 | \$22,968          | \$17,602      | \$28,335 |
| Pharmacy   | \$3,390              | \$2,519       | \$4,261  | \$3,774            | \$2,677       | \$4,872  | \$4,772           | \$2,939       | \$6,605  | \$9,763           | \$7,834       | \$11,691 |
| Outpatient | \$3,465              | \$3,140       | \$3,791  | \$3,645            | \$3,235       | \$4,056  | \$4,833           | \$4,147       | \$5,518  | \$8,932           | \$8,211       | \$9,653  |
| Emergency  | \$1,817              | \$1,478       | \$2,155  | \$2,052            | \$1,625       | \$2,479  | \$2,340           | \$1,627       | \$3,052  | \$2,712           | \$1,962       | \$3,462  |
| Dialysis   | \$58                 | -\$607        | \$723    | \$59               | -\$778        | \$898    | \$1,786           | \$386         | \$3,185  | \$28,027          | \$26,554      | \$29,499 |
| Total      | \$17,213             | \$14,219      | \$20,208 | \$22,471           | \$18,698      | \$26,245 | \$37,903          | \$31,601      | \$44,205 | \$72,402          | \$65,771      | \$79,032 |

Table S2E. Annualized healthcare care costs in total (95% confidence intervals) and by eGFR category and by resource adjusted for age, sex, and race/ethnicity among patients with CKD and HF.

|            | <b>G3a (n=1,477)</b> |               |          | <b>G3b (n=1,163)</b> |               |          | <b>G4 (n=446)</b> |               |          | <b>G5 (n=252)</b> |               |          |
|------------|----------------------|---------------|----------|----------------------|---------------|----------|-------------------|---------------|----------|-------------------|---------------|----------|
|            | <b>Mean</b>          | <b>95% CI</b> |          | <b>Mean</b>          | <b>95% CI</b> |          | <b>Mean</b>       | <b>95% CI</b> |          | <b>Mean</b>       | <b>95% CI</b> |          |
| Inpatient  | \$10,692             | \$8,212       | \$13,172 | \$14,697             | \$11,813      | \$17,581 | \$24,712          | \$19,734      | \$29,690 | \$26,856          | \$20,690      | \$33,022 |
| Pharmacy   | \$3,383              | \$2,799       | \$3,967  | \$3,906              | \$3,226       | \$4,585  | \$4,271           | \$3,098       | \$5,443  | \$5,724           | \$4,271       | \$7,176  |
| Outpatient | \$3,210              | \$2,956       | \$3,465  | \$3,506              | \$3,210       | \$3,801  | \$4,753           | \$4,243       | \$5,263  | \$8,555           | \$7,922       | \$9,187  |
| Emergency  | \$1,956              | \$1,636       | \$2,276  | \$2,083              | \$1,712       | \$2,455  | \$3,115           | \$2,474       | \$3,757  | \$3,147           | \$2,352       | \$3,942  |
| Dialysis   | -\$10                | -\$477        | \$459    | \$104                | -\$440        | \$648    | \$1,078           | \$139         | \$2,017  | \$28,577          | \$27,414      | \$29,740 |
| Total      | \$19,231             | \$16,397      | \$22,066 | \$24,296             | \$20,999      | \$27,592 | \$37,929          | \$32,238      | \$43,619 | \$72,858          | \$65,810      | \$79,906 |

Table S2F. Annualized healthcare care costs in total (95% confidence intervals) and by eGFR category and by resource adjusted for age, sex, and race/ethnicity among patients with CKD, DM and HF.

|            | <b>G3a (n=649)</b> |               |          | <b>G3b (n=591)</b> |               |          | <b>G4 (n=286)</b> |               |          | <b>G5 (n=193)</b> |               |          |
|------------|--------------------|---------------|----------|--------------------|---------------|----------|-------------------|---------------|----------|-------------------|---------------|----------|
|            | <b>Mean</b>        | <b>95% CI</b> |          | <b>Mean</b>        | <b>95% CI</b> |          | <b>Mean</b>       | <b>95% CI</b> |          | <b>Mean</b>       | <b>95% CI</b> |          |
| Inpatient  | \$11,569           | \$7,611       | \$15,527 | \$17,484           | \$13,255      | \$21,713 | \$29,173          | \$22,678      | \$35,668 | \$30,060          | \$22,605      | \$37,515 |
| Pharmacy   | \$3,973            | \$3,107       | \$4,838  | \$5,123            | \$4,198       | \$6,047  | \$4,974           | \$3,554       | \$6,394  | \$6,204           | \$4,574       | \$7,834  |
| Outpatient | \$3,728            | \$3,276       | \$4,180  | \$4,001            | \$3,518       | \$4,484  | \$5,277           | \$4,535       | \$6,018  | \$9,572           | \$8,720       | \$10,423 |
| Emergency  | \$2,242            | \$1,723       | \$2,762  | \$2,527            | \$1,971       | \$3,082  | \$3,231           | \$2,378       | \$4,084  | \$2,966           | \$1,987       | \$3,945  |
| Dialysis   | \$82               | -\$799        | \$963    | \$100              | -\$841        | \$1,041  | \$1,400           | -\$46         | \$2,846  | \$31,678          | \$30,019      | \$33,338 |
| Total      | \$21,594           | \$16,986      | \$26,202 | \$29,234           | \$24,310      | \$34,159 | \$44,054          | \$36,492      | \$51,617 | \$80,480          | \$71,800      | \$89,160 |
